# Supplementary material for: Formation of Ga double grading in submicron Cu(In,Ga)Se2 solar cells by pre-depositing a CuGaSe2 layer
Source: Royal Society of Chemistry journal article supplement (doi:10.1039/d0ta02710c), 2020-01-01
Supplement: d0ta02710c1.pdf [file d0ta02710c1.pdf]

## Supplementary Information

### **Formation of Ga double grading in submicron Cu(In,Ga)Se<sub>2</sub> solar cells by pre-depositing a CuGaSe<sub>2</sub> layer**

Yifan Kong <sup>a,1</sup>, Jianmin Li <sup>a,1</sup>, Zengyang Ma <sup>b</sup>, Zheng Chi <sup>a</sup>, Xudong Xiao <sup>a,b\*</sup>

a: Department of Physics, The Chinese University of Hong Kong, Shatin, Hong Kong.

E-mail: [xdxiao@phy.cuhk.edu.hk](mailto:xdxiao@phy.cuhk.edu.hk).

b: School of Physics and Technology, Wuhan University, Wuhan, Hubei, 430072, China

1: Mr. Yifan Kong and Dr. Jianmin Li contributed equally to this work.

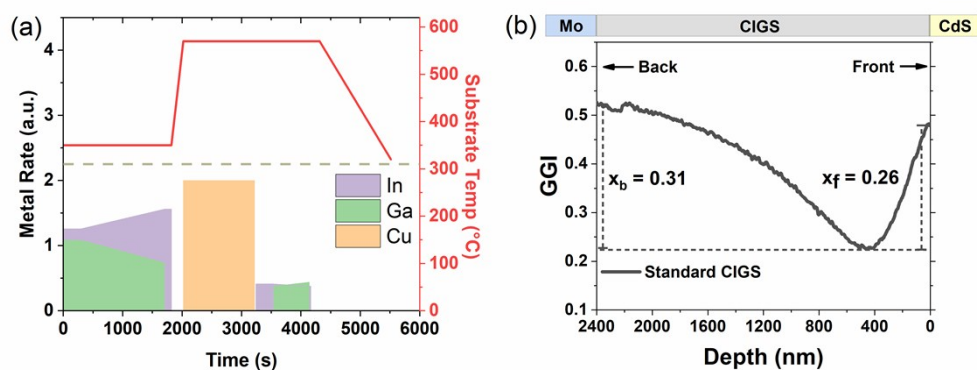

**Fig. S1.** (a) Metal flux rates and sequences for a traditional three-stage growth profile of a standard thick CIGS film. (b) The corresponding GGI curve extracted from the SIMS results.

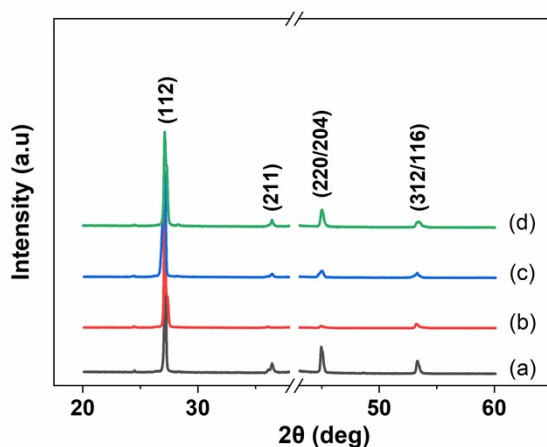

**Fig. S2.** XRD spectra of submicron thick CIGS films with different growth profiles: (a) traditional profile, (b) Ga-In-Ga extreme profile, (c) Ga-In extreme profile, (d) CGS+CIGS profile.

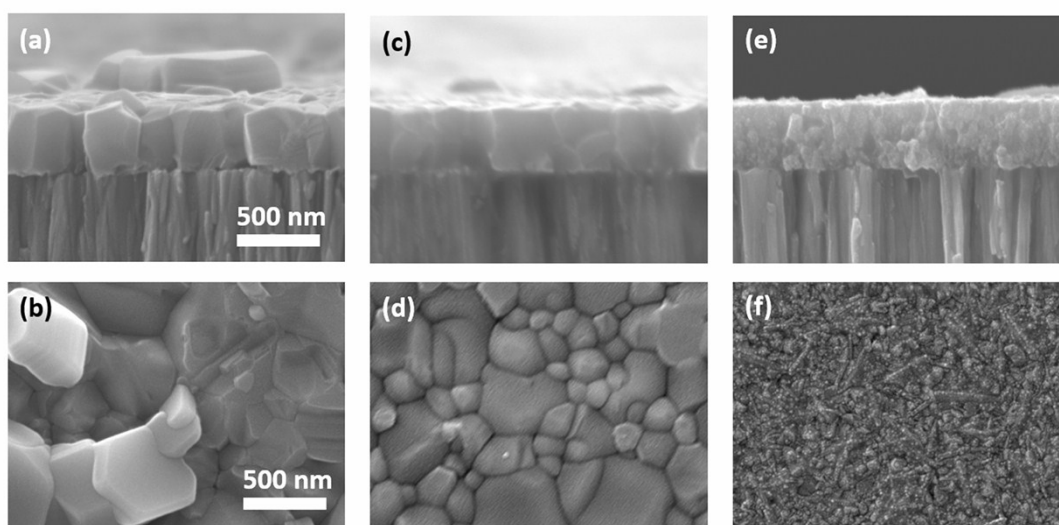

**Fig. S3.** SEM cross-sectional view and top view of CGS with different Cu/Ga ratio (a-b) Cu/Ga = 1.15, (c-d) Cu/Ga = 1, (e-f) Cu/Ga = 0.86.

**Table S1** Parameters of Ga grading of Sample D and E.

| Sample | $x_b$ | $x_f$ | $GGI_{\min}$ | $d_n$ (nm) |
|--------|-------|-------|--------------|------------|
| D      | 0.25  | 0.03  | 0.24         | 246        |
| E      | 0.34  | 0.15  | 0.20         | 254        |
